# Supplementary material for: Segregation of lipids near acetylcholine-receptor channels imaged by cryo-EM
Source: PubMed Central journal article supplement (PMC5571802; doi:10.1107/s2052252517005243), 2017-05-02
Supplement: m-04-00393-sup1.pdf [file m-04-00393-sup1.pdf]

# IUCrJ

**Volume 4 (2017)**

**Supporting information for article:**

**Segregation of lipids near acetylcholine-receptor channels  
imaged by cryo-EM**

**Nigel Unwin**

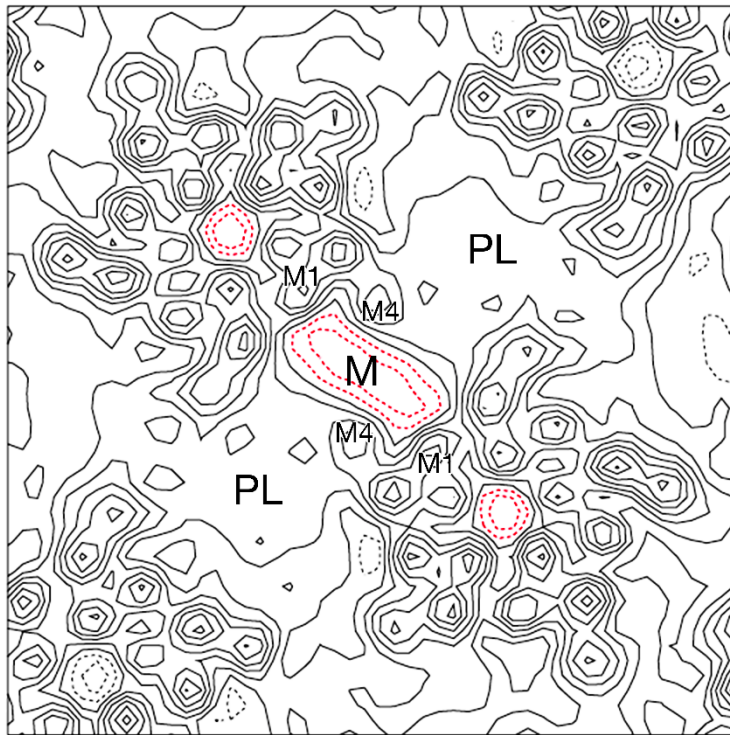

**Figure S1** Contour map of the densities in the middle of the outer headgroup region, corresponding to the boxed area in Fig. 3. The phospholipid headgroups (PL) give rise to a fairly uniform positive density in the space between individual protein molecules, because of their (presumably) random disposition. The space framed by the M1 and M4 helices of the  $\delta$  subunits, and associated with the microdomain (M), is an exception. The weaker density here is equal to that of the lumen of the pore, indicating a depletion of the large phospholipid headgroups and their substitution by water. The presence of cholesterol in the underlying membrane explains this anomaly, since cholesterol exposes only a hydroxyl and contributes no mass this far from the hydrophobic core of the membrane (for examples of simulated cholesterol-containing membranes, see: <http://cmb.bio.uni-goettingen.de/cholmembranes.html>). Contours are at  $0.6\sigma$ , with the relevant microdomain and pore regions in red.

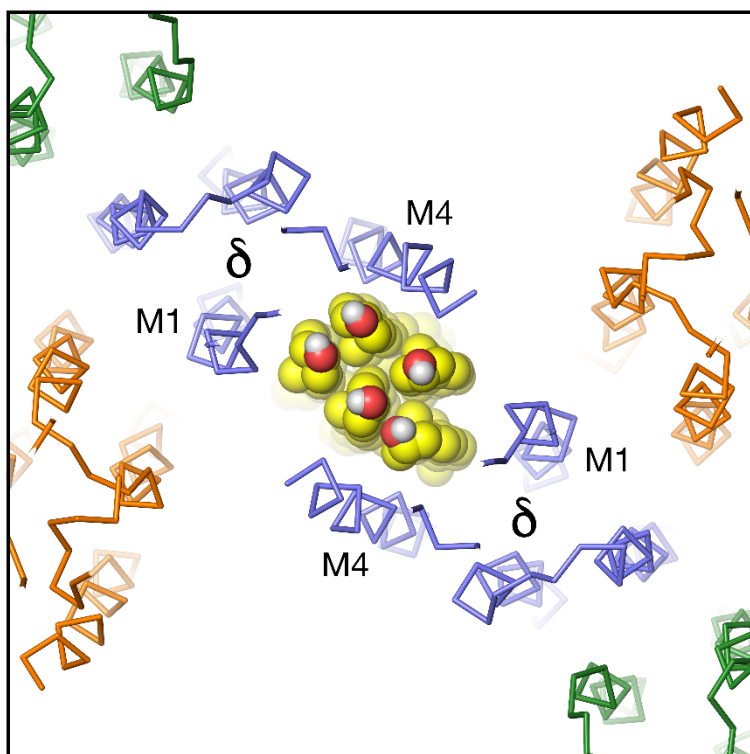

**Figure S2** Hypothetical depiction of a cluster of five cholesterol molecules located in the microdomain space between the  $\delta$  subunits of neighbouring receptors. The figure suggests that the microdomain, fully occupied, could harbour as many as eight cholesterol molecules. The co-ordinates for the cluster were taken from a molecular dynamics simulation of a DOPC bilayer containing 30 mol % cholesterol (Wennberg *et al.*, 2012). The co-ordinates for the receptors were obtained by fitting the atomic model (PDB entry 2bg9) to the densities corresponding to a dimer in the 3D map; subunit colours as in Fig. 2 ( $\alpha_\delta$ , orange;  $\beta$ , green;  $\delta$ , blue).
